# Supplementary material for: Plasmonic IQ modulators with attojoule per bit electrical energy consumption
Source: PubMed Central journal article supplement (PMC6461703; doi:10.1038/s41467-019-09724-7), 2019-04-12
Supplement: 41467_2019_9724_MOESM1_ESM.pdf [file 41467_2019_9724_MOESM1_ESM.pdf]

**Supplementary Information for:**

*Heni, Wolfgang et al.*

*Plasmonic IQ Modulators with Attojoule per Bit*

*Electrical Energy Consumption*

**Supplementary Table 1: State-of-the-art IQ modulators**

| Technology               | Fiber-to-fiber loss [dB] | Device loss [dB] | $U_{\pi}L$ [Vmm] | Active Length [mm] | Line rate [Gbit/s] | EO Bandwidth          | Reference      |
|--------------------------|--------------------------|------------------|------------------|--------------------|--------------------|-----------------------|----------------|
| LiNbO <sub>3</sub>       | ~10                      | -                | 10-100           | 10-100             | 600                | ~40 GHz               | <sup>1,2</sup> |
| GaAs                     | 18                       | < 8 dB           | 90               | 30                 | 150                | ~30 GHz               | <sup>3</sup>   |
| Si                       | ~15                      | 6.8 dB           | 30               | 4.5                | 350                | ~30 GHz               | <sup>4</sup>   |
| InP                      | 9                        | ~2 dB            | ~5               | ~3.6               | 448                | ~70 GHz               | <sup>5,6</sup> |
| SOH                      | 17.5*                    | 8.5 dB           | 1                | 0.6                | 400                | ~40 GHz               | <sup>7</sup>   |
| Plasmonic-Organic Hybrid | 19.2*                    | 11.2             | 0.13             | 0.015              | 400                | >500 GHz <sup>8</sup> | This work      |

\* fiber-to-fiber losses can be reduced to <10 dB when relying on a dedicated fabrication process

**Supplementary Table 2** Summary of investigated devices including fiber-to-fiber and on-chip losses.

| <b>Device</b>  | $L_{\text{active}}$<br>[ $\mu\text{m}$ ] | $w_{\text{slot}}$<br>[nm] | <b>On-chip loss</b><br>[dB] | <b>Photonic-plasmonic converter loss</b><br>[dB] | <b>Loss plasmonic section</b><br>[dB] | <b>Fiber-to-chip coupling loss</b><br>[dB per coupler] | <b>Fiber-to-fiber loss</b><br>[dB] |
|----------------|------------------------------------------|---------------------------|-----------------------------|--------------------------------------------------|---------------------------------------|--------------------------------------------------------|------------------------------------|
| <b>IQ1 621</b> | 15                                       | 130                       | ~11.2                       | ~1.7                                             | ~7.8                                  | ~4                                                     | 19.2                               |
| <b>IQ2 622</b> | 20                                       | 130                       | ~14.5                       | ~1.7                                             | ~11.1                                 | ~4                                                     | 22.5                               |
| <b>IQ3 626</b> | 20                                       | 130                       | ~13.7                       | ~1.7                                             | ~10.3                                 | ~4                                                     | 21.7                               |

**Supplementary Table 3** Measurements of Figure 2

| Modulation                                          | Device | $U_{\text{meas}50\Omega, \text{pp}}$ | $E_{\text{bit}} \dagger$ | BER                     | BER without el. equalizer | $P_{\text{opt}}$ | $U_{\text{IQ, pk}}$ |
|-----------------------------------------------------|--------|--------------------------------------|--------------------------|-------------------------|---------------------------|------------------|---------------------|
|                                                     |        | [V]                                  | [fJ bit <sup>-1</sup> ]  |                         |                           | [dBm]            | [V]                 |
| <b>50 GBd QPSK</b><br>(100 Gbit s <sup>-1</sup> )   | IQ1    | ~2.0                                 | 10.2                     | 6.86×10 <sup>-8*</sup>  | 3.3×10 <sup>-4</sup>      | 20               | ~2.0                |
|                                                     | IQ2    | 1.92                                 | 12.4                     | 4.96×10 <sup>-6†</sup>  | 5.9×10 <sup>-4†</sup>     | 15               | 1.92                |
|                                                     | IQ3    | 1.92                                 | 12.4                     | 8.25×10 <sup>-23*</sup> | 1.9×10 <sup>-9*</sup>     | 18               | 1.92                |
| <b>50 GBd 16QAM</b><br>(200 Gbit s <sup>-1</sup> )  | IQ1    | 2.95                                 | 6.2                      | 1.9×10 <sup>-4†</sup>   | 6.6×10 <sup>-3†</sup>     | 20               | 2.95                |
|                                                     | IQ3    | 1.99                                 | 3.7                      | 3.1×10 <sup>-4</sup>    | 6.8×10 <sup>-3</sup>      | 18               | 1.99                |
| <b>100 GBd QPSK</b><br>(200 Gbit s <sup>-1</sup> )  | IQ1    | 2.23                                 | 12.7                     | 6.63×10 <sup>-9*</sup>  | 1.6×10 <sup>-6</sup>      | 18               | 2.23                |
|                                                     | IQ2    | 3.45                                 | 40.0                     | 1.26×10 <sup>-6*</sup>  | 5.2×10 <sup>-5</sup>      | 19               | 3.45                |
|                                                     | IQ3    | 1.77                                 | 10.5                     | 2.97×10 <sup>-7*</sup>  | 6.5×10 <sup>-5</sup>      | 18               | 1.77                |
| <b>100 GBd 16QAM</b><br>(400 Gbit s <sup>-1</sup> ) | IQ1    | 2.75                                 | 5.36                     | 1.37×10 <sup>-2</sup>   | 6.3×10 <sup>-2</sup>      | 20               | 2.75                |
|                                                     | IQ2    | 2.67                                 | 6.64                     | 1.48×10 <sup>-2</sup>   | 6.4×10 <sup>-2</sup>      | 15               | 2.67                |
|                                                     | IQ3    | 1.48                                 | 2.04                     | 2.36×10 <sup>-2</sup>   | 4.5×10 <sup>-2</sup>      | 20               | 1.48                |

†Device capacitance of IQ1: 2.55 fF, for IQ2 and IQ3: 3.36 fF \*BER estimated from SNR, no/not enough errors counted for statistical relevant measured BER.<sup>9</sup> †Measurement performed with uncalibrated transmitter, BER estimated from SNR.

**Supplementary Table 4** Electrical energy consumption per bit at different symbol rates / modulation formats. All measurements performed with IQ3.

| <b>Modulation</b>                                   | $U_{\text{meas}50\Omega, \text{pp}}$ | $\bar{E}_{\text{bit}}$    | <b>BER</b>             | $U_{\text{DAC, pp}}$ | $U_{\text{IQ, pk}}$ | <b>Attenuator</b> |
|-----------------------------------------------------|--------------------------------------|---------------------------|------------------------|----------------------|---------------------|-------------------|
| <b>25 GBd QPSK</b><br>(50 Gbit s <sup>-1</sup> )    | 145 mV                               | 0.07 fJ bit <sup>-1</sup> | $2.0 \times 10^{-3}$   | 350 mV               | 145 mV              | 6 dB              |
|                                                     | 187 mV                               | 0.12 fJ bit <sup>-1</sup> | $1.66 \times 10^{-5*}$ | 450 mV               | 187 mV              | 6 dB              |
| <b>50 GBd QPSK</b><br>(100 Gbit s <sup>-1</sup> )   | 326 mV                               | 0.36 fJ bit <sup>-1</sup> | $2.0 \times 10^{-4}$   | 350 mV               | 326 mV              | 0 dB              |
| <b>50 GBd 16 QAM</b><br>(200 Gbit s <sup>-1</sup> ) | 567 mV                               | 0.30 fJ bit <sup>-1</sup> | $2.0 \times 10^{-2}$   | 650 mV               | 567 mV              | 0 dB              |
| <b>100 GBd QPSK</b><br>(200 Gbit s <sup>-1</sup> )  | 426 mV                               | 0.61 fJ bit <sup>-1</sup> | $1.4 \times 10^{-3}$   | 650 mV               | 426 mV              | 0 dB              |
| <b>100 GBd 16QAM</b><br>(400 Gbit s <sup>-1</sup> ) | 1.48 V                               | 2.04 fJ bit <sup>-1</sup> | $2.36 \times 10^{-2}$  | 650 mV               | 1.48 V              | RF Amplifier      |

\* BER estimated from SNR, no/not enough errors counted for statistical relevant measured

BER.<sup>9</sup>

**Supplementary Table 5:** Operation at elevated temperatures. Measurement parameters of measurements M1-M5 shown in Figure 3. All measurements at 100 Gbit s<sup>-1</sup> (50GBd QPSK).

|           | Temp  | Time at temp | Operating time | BER                     | EVM                 |
|-----------|-------|--------------|----------------|-------------------------|---------------------|
|           | ~22.5 | >8h          | 7h             | $8.4 \times 10^{-06*†}$ | 22.5 % <sup>†</sup> |
| <b>M1</b> | 42 °C | 20 min       | 7.8 h          | $3.9 \times 10^{-8*}$   | 18.4 %              |
| <b>M2</b> | 65 °C | 25 min       | 8.7 h          | $6.38 \times 10^{-7*}$  | 20.1 %              |
| <b>M3</b> | 65 °C | 70 min       | 9.4 h          | $9.24 \times 10^{-6*}$  | 22.6 %              |
| <b>M4</b> | 75 °C | 20 min       | 10 h           | $7.08 \times 10^{-7*}$  | 20.4 %              |
| <b>M5</b> | 75 °C | 80 min       | 11 h           | $2.31 \times 10^{-6*}$  | 21.2 %              |

\* BER estimated from SNR, no/not enough errors counted for statistical relevant measured BER.<sup>9</sup> †Measurement performed with uncalibrated transmitter.

## Supplementary References

- 1 Schuh, K. *et al.* Single carrier 1.2 Tbit/s transmission over 300 km with PM-64 QAM at 100 GBaud. in *Optical Fiber Communication Conference*. Th5B. 5 (Optical Society of America).
- 2 Raybon, G. *et al.* Single-carrier all-ETDM 1.08-Terabit/s line rate PDM-64-QAM transmitter using a high-speed 3-bit multiplexing DAC. in *2015 IEEE Photonics Conference (IPC)*. 1-2.
- 3 Schindler, P. C. *et al.* Monolithic GaAs electro-optic IQ modulator demonstrated at 150 Gbit/s with 64QAM. *Journal of Lightwave Technology* **32**, 760-765 (2014).
- 4 Lin, J., Sepehrian, H., Rusch, L. A. & Shi, W. CMOS-Compatible Silicon Photonic IQ Modulator for 84 Gbaud 16QAM and 70 Gbaud 32QAM. in *2018 Optical Fiber Communications Conference and Exposition (OFC)*. 1-3.
- 5 Ogiso, Y. *et al.* Over 67 GHz bandwidth and 1.5 V  $V\pi$  InP-based optical IQ modulator with nipi heterostructure. *Journal of Lightwave Technology* **35**, 1450-1455 (2017).
- 6 Ogiso, Y. *et al.* Ultra-High Bandwidth InP IQ Modulator co-assembled with Driver IC for Beyond 100-GBd CDM. in *Optical Fiber Communication Conference*. Th4A. 2 (Optical Society of America).
- 7 Wolf, S. *et al.* Coherent modulation up to 100 GBd 16QAM using silicon-organic hybrid (SOH) devices. *Opt. Express* **26**, 220-232 (2018).
- 8 Burla, M. *et al.* 500 GHz plasmonic Mach-Zehnder modulator enabling sub-THz microwave photonics. *arXiv preprint arXiv:1901.00477* (2018).
- 9 Schmogrow, R. *et al.* Error vector magnitude as a performance measure for advanced modulation formats. *Ieee Photonic Tech L* **24**, 61-63 (2012).
